# Supplementary material for: Gluconeogenesis, lipogenesis, and HBV replication are commonly regulated by PGC-1α-dependent pathway
Source: Oncotarget. 2015 Feb 3;6(10):7788–803. doi: 10.18632/oncotarget.3050 (PMC4480716; doi:10.18632/oncotarget.3050)
Supplement: Supplementary file 1 [file oncotarget-06-7788-s001.pdf]

## SUPPLEMENTARY FIGURES

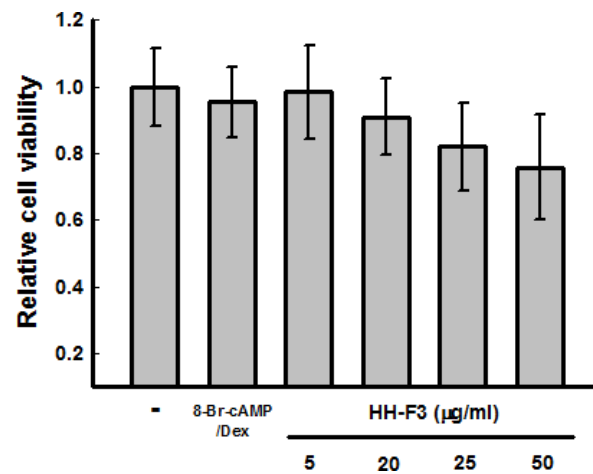

**Supplementary Figure S1: The effect of HH-F3 on cell viability in Hep3B/T2 cells.** Hep3B/T2 cells were treated with different concentrations of HH-F3 in serum-free DMEM for 24 h. Cell viability was determined by the MTT assay.

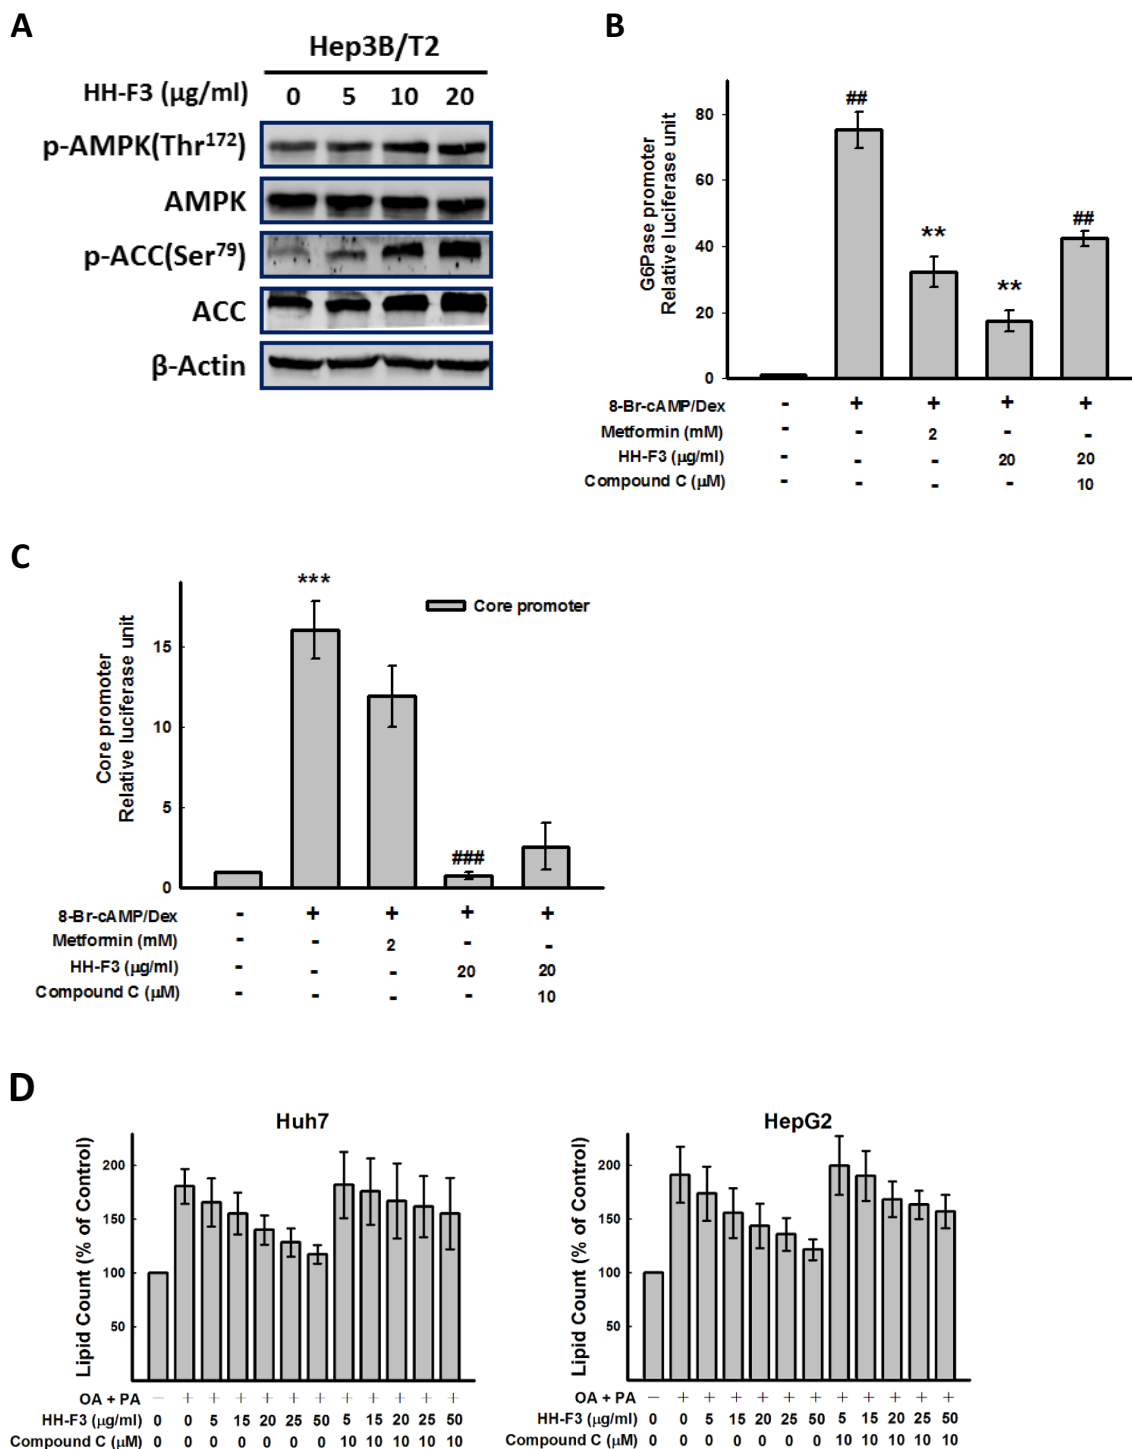

**Supplementary Figure S2: HH-F3 may act through the activation of AMPK to suppress gluconeogenic enzyme gene expression.** Hep3B/T2 cells were pretreated with 8-Br-cAMP/Dex for 30 min, followed by the addition of different concentrations of HH-F3 in serum-free DMEM for 24 h. (A) Cell extracts were subjected to Western blotting. (B) For the promoter activity assay, Hep3B/T2 cells were transfected with luciferase reporter plasmids driven by the glucose-6-phosphatase promoter. 8-Br-cAMP/Dex stimulated G6Pase promoter activities were assayed in the absence or presence of either HH-F3 or HH-F3 with the AMPK inhibitor Compound C. One day after treatment, the cell lysates were prepared for luciferase activity analysis as described previously. Metformin was used as an AMPK positive control. (C) 8-Br-cAMP/Dex-stimulated Core promoter activities were assayed in the absence or presence of either HH-F3 or HH-F3 with the AMPK inhibitor Compound C. One day after treatment, cell lysates were prepared for luciferase activity analysis. (D) OA- and PA-stimulated intracellular lipid accumulation in Huh7 and HepG2 cells was assayed in the absence or presence of either HH-F3 or HH-F3 with the AMPK inhibitor Compound C.  $^{**}P < 0.01$ ,  $^{***}P < 0.005$  compared with the vehicle group.  $^{##}P < 0.01$ ,  $^{###}P < 0.005$ , compared with the 8-Br-cAMP/Dex-induced group.

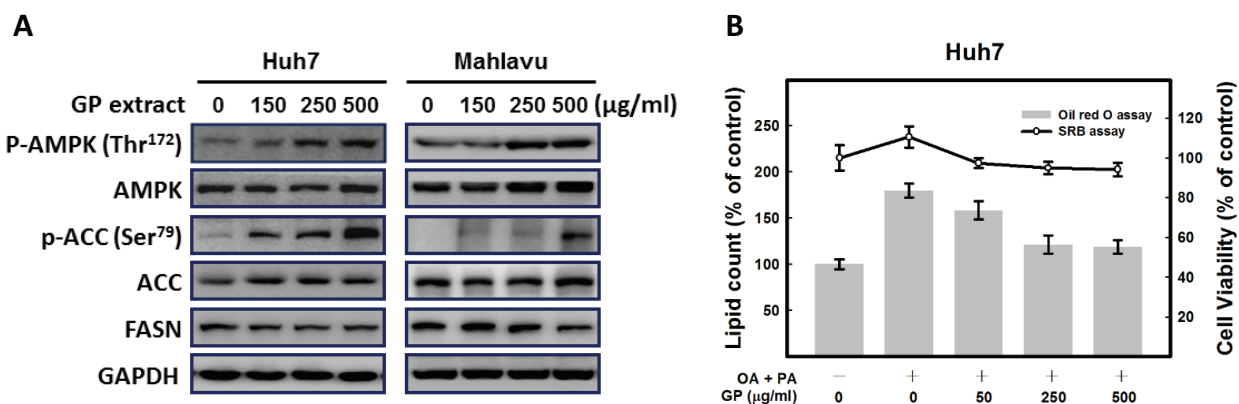

**Supplementary Figure S3: GP extract suppresses lipogenesis.** (A) Huh7 and Mahlavu cells were treated with 30% DMSO GP extract, and then subjected to western blot analysis using antibodies against phospho-AMPK, phospho-ACC (Ser<sup>79</sup>), AMPK, ACC, and FASN ( $n = 3$ ). (B) Incubation of Huh7 cells with OA and PA for 24 h resulted in a significant intracellular lipid accumulation as visualized by Oil red O staining. Cell viability was determined by SRB assay. (OA + PA/HH-F3: oleic acid and palmitic acid with HH-F3 co-treatment). Huh7 cells treated with GP extract can reduce fat load as quantified by Oil Red O staining of intracellular lipid droplets.

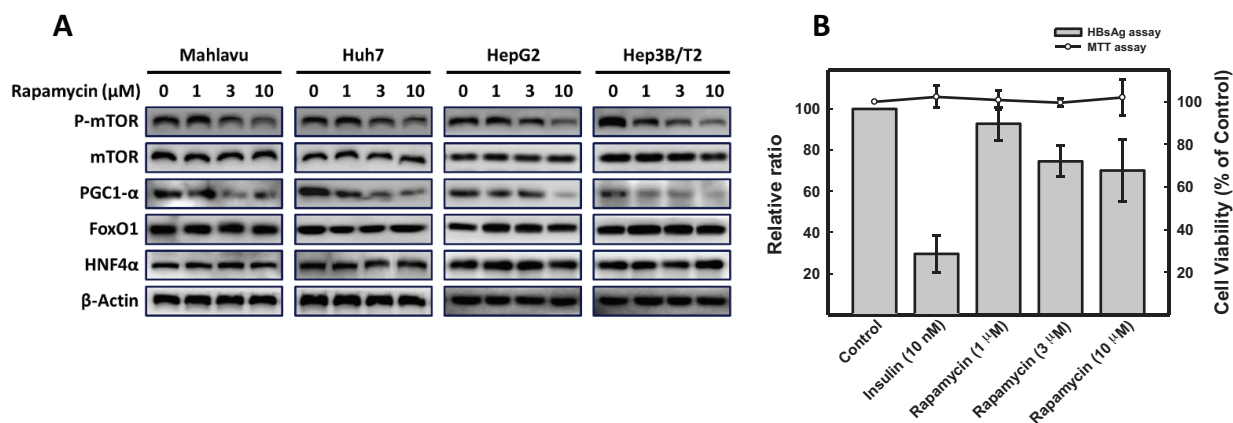

**Supplementary Figure S4: Effect of rapamycin in PGC-1α-regulated-HBV gene expression.** (A) HepG2, Huh7, Hep3B/T2, and Mahlavu cells were treated with rapamycin for 24 h, and then were subjected to Western blot analysis. (B) Hep3B/T2 cells were treated with different concentrations of rapamycin in serum-free DMEM medium for 48 h. HBsAg was determined by ELISA. Insulin was used as a positive control.
